# Supplementary material
Source: publisher figshare collection journal article supplement (https://tandf.figshare.com/articles/dataset/_/9775505)
Supplement: Supplementary file 1 [file 2 › supplemental.pdf]

## Supplemental Information

### Mixing state evolution of agglomerating particles in an aerosol chamber: Comparison of measurements and particle-resolved simulations

#### 1 Fractal formalism

The fractal structure can be expressed by a power law between the number of primary particles,  $N$ , and a characteristic radius  $R$  (m) (Friedlander, 2000), with

$$N \sim R^{d_f}, \quad (\text{S-1})$$

where the exponent  $d_f$  is the fractal (or Hausdorff) dimension. In the approach proposed by Naumann (2003),  $R$  is expressed by the geometric radius  $R_{\text{geo}}$  (m) of a fractal particle, which is defined as the radius of the particle's closest convex envelope. Let  $m(R_{\text{geo}})$  (kg) be the particle mass, so  $R_{\text{geo}}$  can be related to  $m(R_{\text{geo}})$  by

$$R_{\text{geo}} = R_0 \left( \frac{3fm(R_{\text{geo}})}{4\pi\rho R_0^3} \right)^{\frac{1}{d_f}}, \quad (\text{S-2})$$

where  $R_0$  is the radius of the primary particles. To obtain the diffusion coefficient  $D$  needed to calculate the Brownian coagulation rate,  $R_{\text{geo}}$  is first converted to a mobility equivalent radius in the continuum regime  $R_{\text{me,c}}$  (m) using a convenient mathematical form based on the Kirkwood-Riseman (KR) theory (Kirkwood and Riseman, 1948):

$$R_{\text{me,c}} = h_{\text{KR}} R_{\text{geo}} = (-0.06483d_f^2 + 0.6353d_f - 0.4898)R_{\text{geo}}, \quad (\text{S-3})$$

where  $h_{\text{KR}}$  is the Kirkwood-Riseman ratio. The mobility equivalent radius  $R_{\text{me}}$  that covers the entire dynamic regime can then be obtained by

$$R_{\text{me}} = R_{\text{me,c}} \frac{C(R_{\text{me}})}{C(R_{\text{eff}})}. \quad (\text{S-4})$$

Eq. (S-4) is solved iteratively to obtain  $R_{\text{me}}$ . Eqs. (S-2), (S-3), and (S-4) allow the conversion between the measured mobility size distribution (e.g., from a differential mobility analyzer or scanning mobility particle sizer) and the corresponding mass distribution. In Eq. (S-4),  $R_{\text{eff}}$  is the effective radius, and  $C$  is a correction function considering the transition from the continuum to the free molecular regime.  $R_{\text{eff}}$  is given by

$$R_{\text{eff}} = \frac{S_{\text{acc}}}{4\pi R_{\text{me,c}}} \quad (\text{S-5})$$

$$S_{\text{acc}} = 4\pi R_0^2 N^{d_s/3} \left[ (d_s - 2) \left( \frac{z}{N} \right)^{1-\gamma} - d_s + 3 \right], \quad (\text{S-6})$$

where  $d_s$  is the surface fractal dimension, which has the value of 3 when  $d_f \leq 2$ , and  $6/d_f$  when  $2 \leq d_f \leq 3$ . The symbols  $z$  and  $\gamma$  are the scaling factor and exponent with values of 1 and 0.86, respectively.

The correction function  $C$  in Eq. (S-4) has the form

$$C(R) = 1 + A\frac{l}{R} + Q\frac{l}{R} \exp\left(-b\frac{R}{l}\right), \quad (\text{S-7})$$

where  $A = 1.142$ ,  $Q = 0.588$ , and  $b = 0.999$  are constant parameters with values determined empirically (Allen and Raabe, 1985; Cheng et al., 1988), and  $l$  is the mean free path of carrier gas molecules.

After obtaining  $R_{\text{me}}$  from Eq. (S-4), the diffusion coefficient  $D$  of fractal particles is calculated as

$$D = \frac{kTC(R_{\text{me}})}{6\pi\eta R_{\text{me}}}, \quad (\text{S-8})$$

where  $k$  ( $\text{J K}^{-1}$ ) is the Boltzmann constant,  $T$  (K) is the temperature, and  $\eta$  ( $\text{kg m}^{-1} \text{s}^{-1}$ ) is the gas viscosity. Then the Brownian coagulation kernel  $K(\mu, \nu)$  can be written as

$$K(\mu, \nu) = \frac{4\pi (D(R_{\text{me},\mu}) + D(R_{\text{me},\nu})) (R_{\text{geo},\mu} + R_{\text{geo},\nu})}{1 + G_{\mu\nu}} \quad (\text{S-9})$$

$$G_{\mu\nu} = \frac{4 (D(R_{\text{me},\mu}) + D(R_{\text{me},\nu}))}{R_{\text{geo},\mu} + R_{\text{geo},\nu}} \sqrt{\frac{\pi m_\mu m_\nu}{8kT(m_\mu + m_\nu)}}. \quad (\text{S-10})$$

## References

- Allen, M. D. and O. G. Raabe. Slip correction measurements of spherical solid aerosol particles in an improved Millikan apparatus. *Aerosol Sci. Technol.*, 4(3):269–286, 1985.
- Cheng, Y.-S., M. D. Allen, D. P. Gallegos, H.-C. Yeh, and K. Peterson. Drag force and slip correction of aggregate aerosols. *Aerosol Sci. Technol.*, 8(3):199–214, 1988.
- Friedlander, S. K. *Smoke, dust and haze: fundamentals of aerosol dynamics*. New York; Oxford: Oxford University Press, 2000.
- Kirkwood, J. G. and J. Riseman. The intrinsic viscosities and diffusion constants of flexible macromolecules in solution. *J. Chem. Phys.*, 16(6):565–573, 1948.
- Naumann, K. COSIMA—a computer program simulating the dynamics of fractal aerosols. *J. Aerosol Sci.*, 34(10):1371–1397, 2003.
