# Supplementary material
Source: publisher figshare collection journal article supplement (https://tandf.figshare.com/articles/dataset/_/9775505)
Supplement: Supplementary file 1 [file 2 › supplemental.tex]

\documentclass[11pt,a4paper]{article}
\usepackage{fullpage}
\usepackage[authoryear, sort&compress]{natbib}
\usepackage{graphicx}
\usepackage{wrapfig}
%\usepackage{sectsty}
\usepackage{amsmath}
\usepackage{amsfonts}
\usepackage{subfig}
\usepackage{textcomp}
\usepackage{ctable}
\usepackage{array}
\usepackage[normalem]{ulem}
\usepackage{hyperref}
%\sectionfont{\normalsize}
%\subsectionfont{\normalsize}
\providecommand{\e}[1]{\ensuremath{\cdot 10^{#1}}}

%%%%%%%%%%%%%%%%%%%%%%%%%%%%%%%%%%%%%%%%%%%%%%%%%%%%%%%%%%%%%%%%%%%%%%%%%%%%%% 
% todos 

\newcommand{\todo}[1]{{\color{red} #1}}
\newcommand{\done}[1]{{\color{blue} #1}}
\newcommand{\change}[1]{{\color{cyan} #1}}

%%%%%%%%%%%%%%%%%%%%%%%%%%%%%%%%%%%%%%%%%%%%%%%%%%%%%%%%%%%%%%%%%%%%%%%%%%%%%%

\graphicspath{{./graphics/}}
\begin{document}
%%%%%%%%%%%%%%%%%%%%%%%%%%%%%%%%%%%%%%%%%%%%%%%%%%%%%%%%%%%%%%%%%%%%%%%%%%%%%%
\section*{Supplemental Information}
\section*{Mixing state evolution of agglomerating particles in an aerosol chamber: Comparison of measurements and particle-resolved simulations}

\renewcommand{\theequation}{S-\arabic{equation}}
\setcounter{equation}{0} \renewcommand{\thefigure}{S-\arabic{figure}}
\setcounter{figure}{0} \renewcommand{\thesection}{\arabic{section}}
\setcounter{section}{0}

\vspace{1cm}
\section{Fractal formalism}\label{sec:fractal}

The fractal structure can be expressed by a power law between the  number
of primary particles, $N$, and a characteristic radius $R$ (m)
\citep{Friedlander2000}, with
\begin{align}
  N \sim R^{d_{\rm f}},
\end{align}
where the exponent $d_{\rm f}$ is the fractal (or Hausdorff)
dimension. In the approach proposed by \citet{Naumann2003}, $R$ is
expressed by the geometric radius $R_{\rm geo}$ (m) of a
fractal particle, which is defined as the radius of the particle's
closest convex envelope. Let $m(R_{\rm geo})$ (kg) be the particle
mass, so $R_{\rm geo}$ can be related to $m(R_{\rm geo})$ by
\begin{align}
  R_{\rm geo} = R_0 \left( \frac{3 f m(R_{\rm geo})}{4 \pi \rho R_0^3} \right)^{\frac{1}{d_{\rm f}}}, \label{eq:Rgeo}
\end{align}
where $R_0$ is the radius of the primary particles.
To obtain the diffusion coefficient $D$ needed to calculate the
Brownian coagulation rate, $R_{\rm geo}$ is first converted to a
mobility equivalent radius in the continuum regime $R_{\rm me, c}$~(m)
using a convenient mathematical form based on the Kirkwood-Riseman
(KR) theory \citep{Kirkwood1948}:
\begin{align}
  R_{\rm me, c} = h_{\rm KR} R_{\rm geo} = (-0.06483 d_{\rm f}^2 + 0.6353 d_{\rm f} - 0.4898) R_{\rm geo}, \label{eq:Rmec}
\end{align}
where $h_{\rm KR}$ is the Kirkwood-Riseman ratio. The mobility equivalent
radius $R_{\rm me}$ that covers the entire dynamic regime can then be
obtained by
\begin{align}
  R_{\rm me} = R_{\rm me, c} \frac{C(R_{\rm me})}{C(R_{\rm eff})}. \label{eq:Rme}
\end{align}
Eq.~(\ref{eq:Rme}) is solved iteratively to obtain $R_{\rm
  me}$. Eqs.~(\ref{eq:Rgeo}), (\ref{eq:Rmec}), and( \ref{eq:Rme})
allow the conversion between the measured mobility size distribution
(e.g., from a differential mobility analyzer or scanning mobility
particle sizer) and the corresponding mass distribution. In
Eq.~(\ref{eq:Rme}), $R_{\rm eff}$ is the effective radius, and $C$ is
a correction function considering the transition from the continuum to
the free molecular regime. $R_{\rm eff}$ is given by
\begin{align}
  R_{\rm eff} &= \frac{S_{\rm acc}}{4 \pi R_{\rm me,c}} \\
  S_{\rm acc} &= 4 \pi R_0^2 N^{d_{\rm s} / 3} \left[(d_{\rm s} - 2) \left(\frac{z}{N}\right)^{1 - \gamma} - d_{\rm s} + 3\right],
\end{align}
where $d_{\rm s}$ is the surface fractal dimension, which has the
value of 3 when $d_{\rm f} \leq 2$, and $6 / d_{\rm f}$ when $2 \leq
d_{\rm f} \leq 3$. The symbols $z$ and $\gamma$ are the scaling factor
and exponent with values of 1 and 0.86, respectively.

The correction function $C$ in Eq.~(\ref{eq:Rme}) has the form
\begin{align}
  C(R) = 1 + A \frac{l}{R} + Q \frac{l}{R} \exp \left(-b
  \frac{R}{l}\right),
\end{align}
where $A$ = 1.142, $Q$ = 0.588, and $b$ = 0.999 are constant
parameters with values determined empirically \citep{Allen1985,
  Cheng1988}, and $l$ is the mean free path of carrier gas molecules.

After obtaining $R_{\rm me}$ from Eq.~(\ref{eq:Rme}), the diffusion
coefficient $D$ of fractal particles is calculated as
\begin{align}
  D = \frac{k T C(R_{\rm me})}{6 \pi \eta R_{\rm me}},
\end{align}
where $k$ ($\rm J~K^{-1}$) is the Boltzmann constant, $T$ (K) is the
temperature, and $\eta$ ($\rm kg~m^{-1}~s^{-1}$) is the gas
viscosity. Then the Brownian coagulation kernel $K(\mu, \nu)$ can be
written as
\begin{align}
  K(\mu, \nu) &= \frac{4 \pi \left(D(R_{\rm me, \mu}) + D(R_{\rm me, \nu})\right) \left(R_{\rm geo, \mu} + R_{\rm geo, \nu}\right)}{1 + G_{\mu \nu}} \\
  G_{\mu \nu} &= \frac{4 \left(D(R_{\rm me, \mu}) + D(R_{\rm me, \nu})\right)}{R_{\rm geo, \mu} + R_{\rm geo, \nu}} \sqrt{\frac{\pi m_{\mu} m_{\nu}}{8 k T (m_{\mu} + m_{\nu})}}.
\end{align}

\begin{thebibliography}{5}
\providecommand{\natexlab}[1]{#1}
\expandafter\ifx\csname urlstyle\endcsname\relax
  \providecommand{\doi}[1]{doi:\discretionary{}{}{}#1}\else
  \providecommand{\doi}{doi:\discretionary{}{}{}\begingroup
  \urlstyle{rm}\Url}\fi

\bibitem[{Allen and Raabe(1985)}]{Allen1985}
Allen, M.~D. and O.~G. Raabe.
\newblock Slip correction measurements of spherical solid aerosol particles in
  an improved {M}illikan apparatus.
\newblock \emph{Aerosol Sci. Technol.}, 4(3):269--286, 1985.

\bibitem[{Cheng et~al.(1988)Cheng, Allen, Gallegos, Yeh, and
  Peterson}]{Cheng1988}
Cheng, Y.-S., M.~D. Allen, D.~P. Gallegos, H.-C. Yeh, and K.~Peterson.
\newblock Drag force and slip correction of aggregate aerosols.
\newblock \emph{Aerosol Sci. Technol.}, 8(3):199--214, 1988.

\bibitem[{Friedlander(2000)}]{Friedlander2000}
Friedlander, S.~K.
\newblock \emph{Smoke, dust and haze: fundamentals of aerosol dynamics}.
\newblock New York; Oxford: Oxford University Press, 2000.

\bibitem[{Kirkwood and Riseman(1948)}]{Kirkwood1948}
Kirkwood, J.~G. and J.~Riseman.
\newblock The intrinsic viscosities and diffusion constants of flexible
  macromolecules in solution.
\newblock \emph{J. Chem. Phys.}, 16(6):565--573, 1948.

\bibitem[{Naumann({2003})}]{Naumann2003}
Naumann, K.
\newblock {COSIMA---a computer program simulating the dynamics of fractal
  aerosols}.
\newblock \emph{{J. Aerosol Sci.}}, {34}({10}):{1371--1397}, {2003}.

\end{thebibliography}

\end{document}
